# Supplementary material for: Novel high-pressure phases of nitrogen-rich Y–N compounds
Source: Royal Society of Chemistry journal article supplement (doi:10.1039/d2dt03394a), 2022-12-20
Supplement: d2dt03394a1.pdf [file d2dt03394a1.pdf]

## Supporting Information

Novel high-pressure phases of nitrogen-rich Y-N compounds

Shuang Liu, Dan Xu, Ran Liu, Zhen Yao\* and Peng Wang\*

State Key Laboratory of Superhard Materials, College of Physics, Jilin  
University, Changchun 130012, P.R.China.

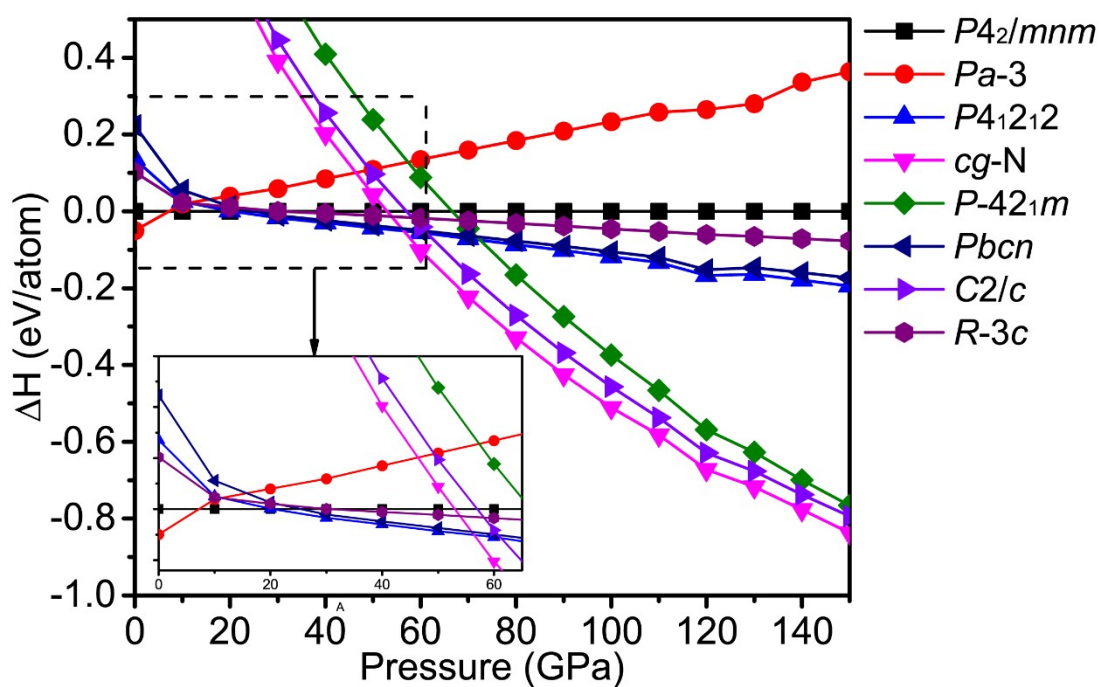

Fig.S1. Enthalpy-pressure diagrams of various nitrogen phases at 0-150 GPa.

---

\* Corresponding author.  
E-mail address: yaozhen@jlu.edu.cn  
E-mail address: wangpengtrrs@jlu.edu.cn

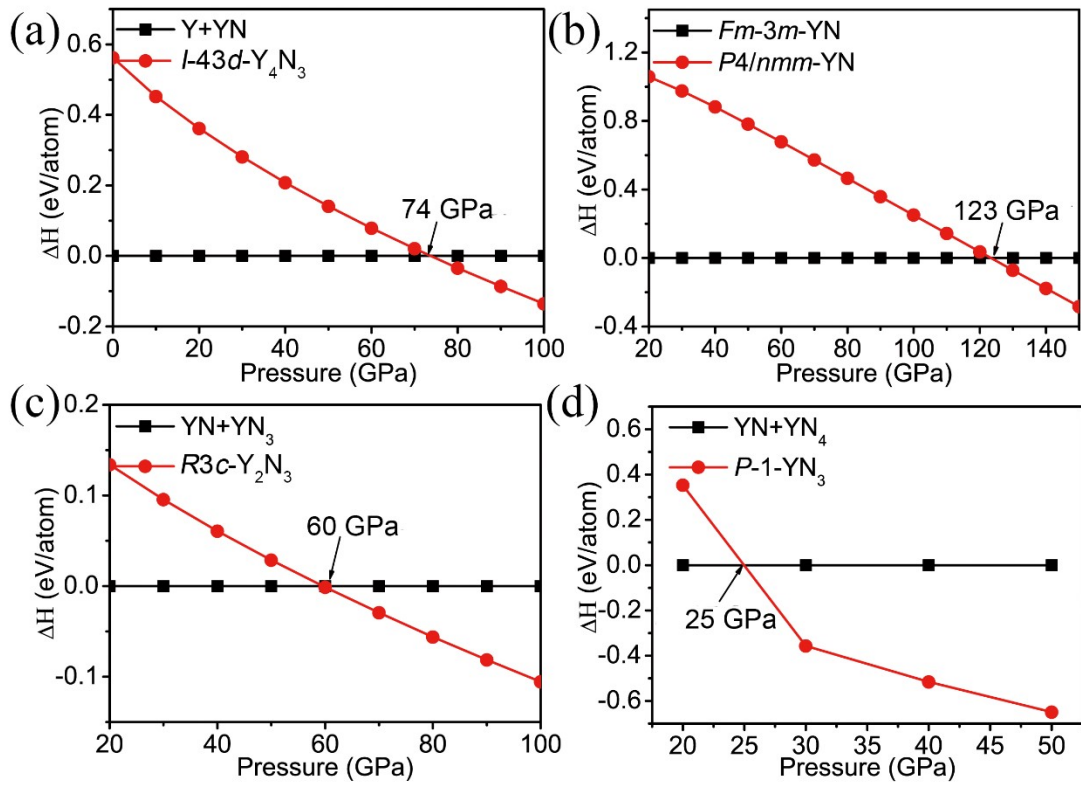

**Figure.S2.** Enthalpy-pressure diagrams of  $Y_4N_3$  (a),  $YN$  (b),  $Y_2N_3$  (c) and  $YN_3$  (d).

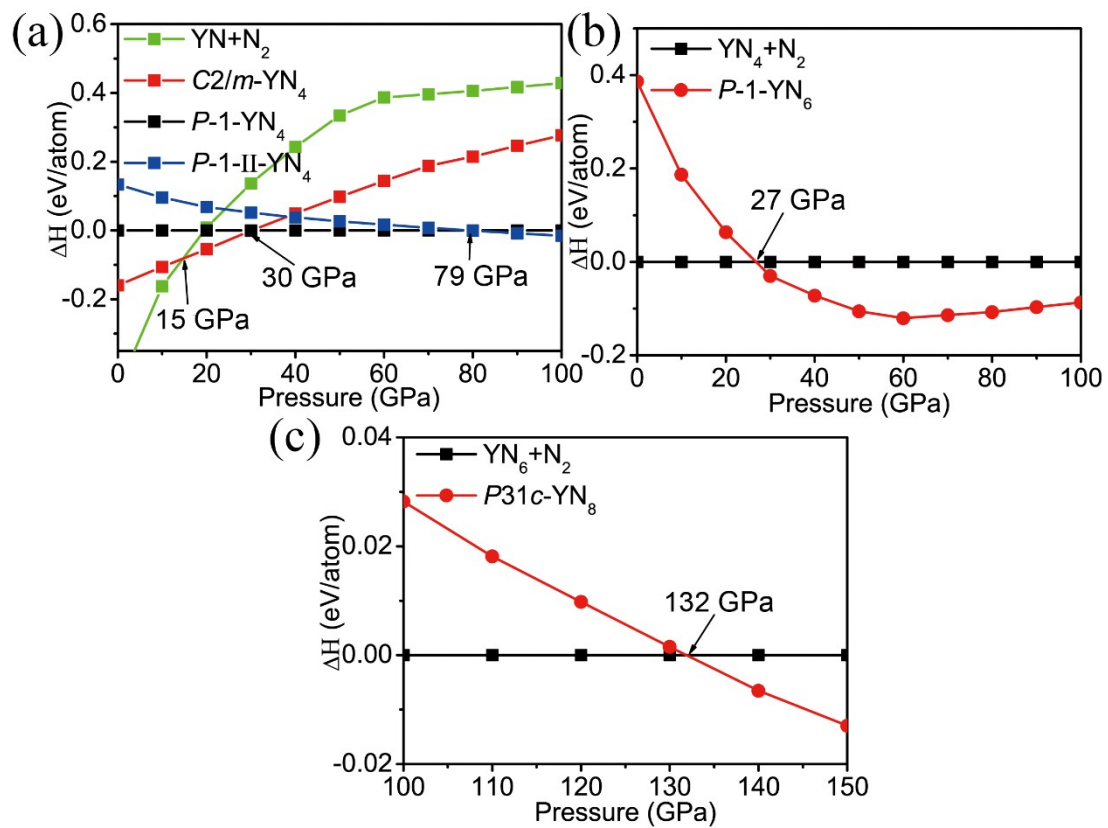

**Figure.S3.** Enthalpy-pressure diagrams of  $YN_4$  (a),  $YN_6$  (b) and  $YN_8$  (c).

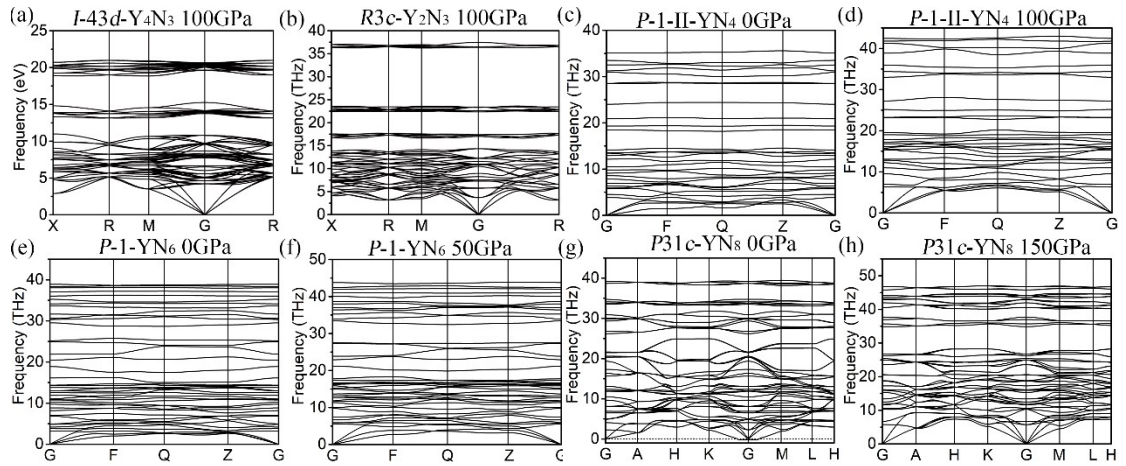

**Figure.S4.** The phonon dispersion curves for (a)  $I-43d-Y_4N_3$  phase at 100 GPa; (b)  $R3c-Y_2N_3$  phase at 100 GPa; (c)  $P-1-II-YN_4$  at 0 GPa; (d)  $P-1-II-YN_4$  at 100 GPa; (e)  $P-1-YN_6$  at 0 GPa; (f)  $P-1-YN_6$  at 50 GPa; (g)  $P31c-YN_8$  at 0 GPa; and (h)  $P31c-YN_8$  at 150 GPa.

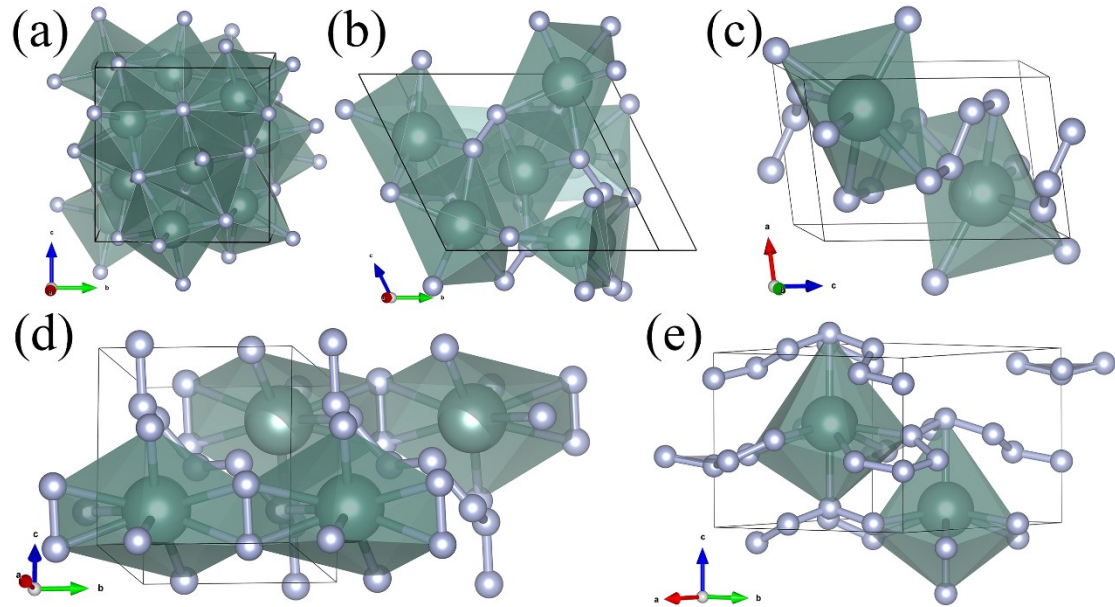

**Figure.S5.** The polyhedral structures of predicted Y-N compounds: (a)  $I-43d-Y_4N_3$  phase at 100 GPa; (b)  $R3c-Y_2N_3$  phase at 100 GPa; (c)  $P-1-II-YN_4$  phase at 100 GPa; (d)  $P-1-YN_6$  phase at 50 GPa and (e)  $P31c-YN_8$  phase at 150 GPa. The green and white spheres denote Y and nitrogen atoms, respectively.

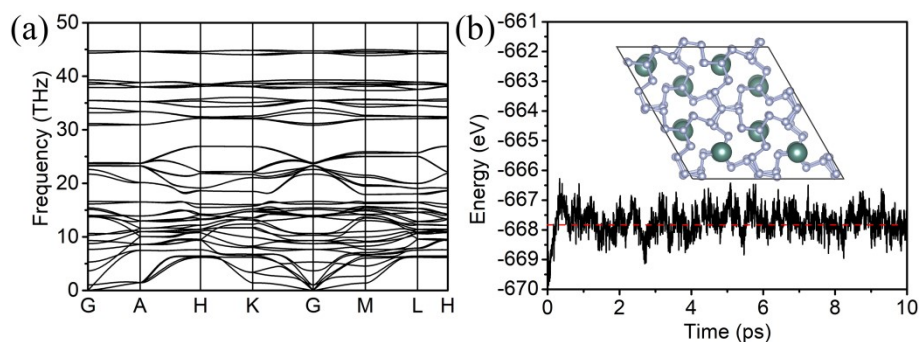

**Figure.S6.** The phonon dispersion curves for  $P31c\text{-YN}_8$  at 60 GPa (a); fluctuations of total energies and snapshots of  $P31c\text{-YN}_8$  at 60 GPa (b).

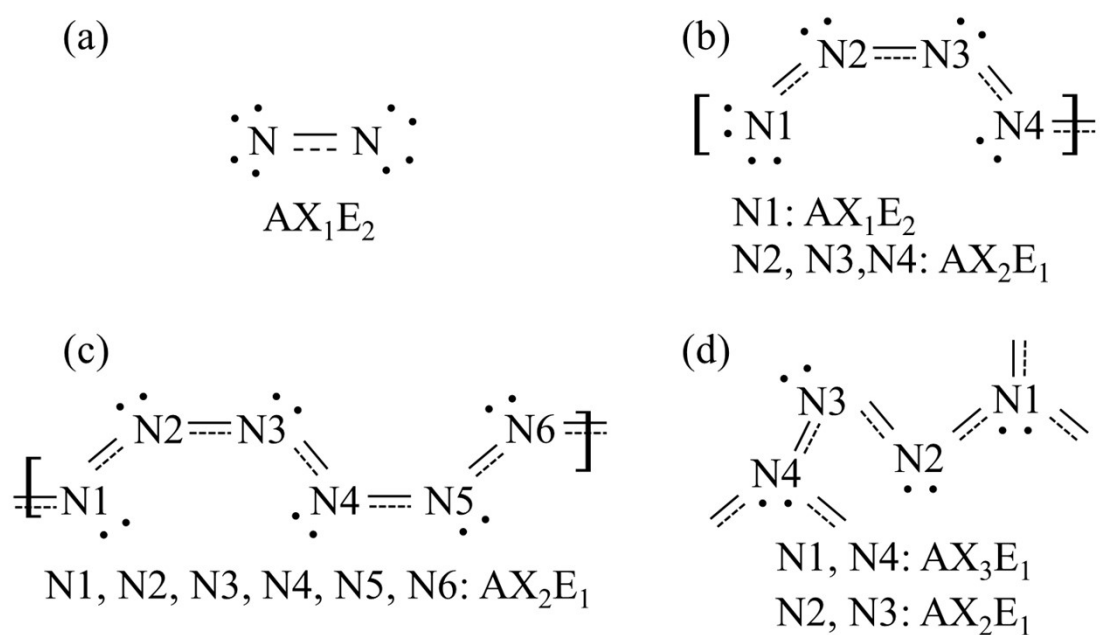

**Figure.S7** Lewis structure for the periodic unit of the (a)  $R3c\text{-Y}_2\text{N}_3$ , (b)  $P\text{-}1\text{-II}\text{-YN}_4$ , (c)  $P\text{-}1\text{-YN}_6$ , and (d)  $P31c\text{-YN}_8$ .

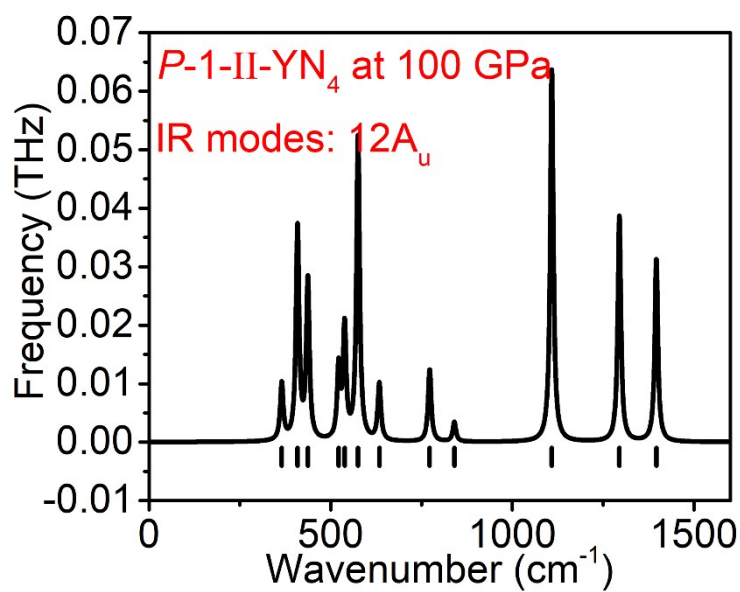

**Figure.S8** The IR spectrum of  $P-1-II-YN_4$  at 100 GPa.

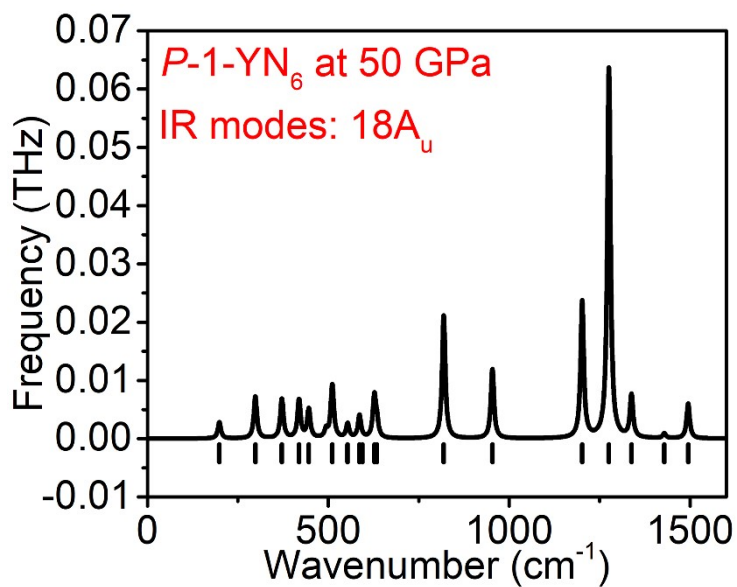

**Figure.S9** The IR spectrum of  $P-1-YN_6$  at 50 GPa.



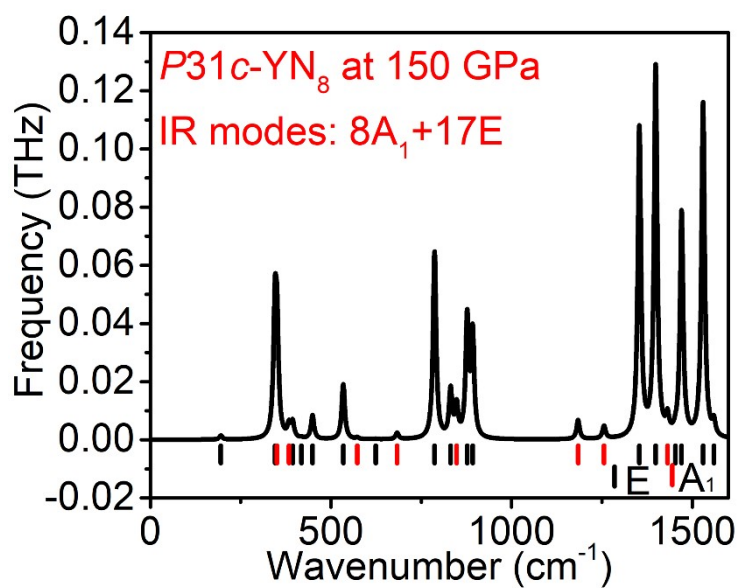

**Figure.S10** The IR spectrum of  $P31c\text{-YN}_8$  at 150 GPa.

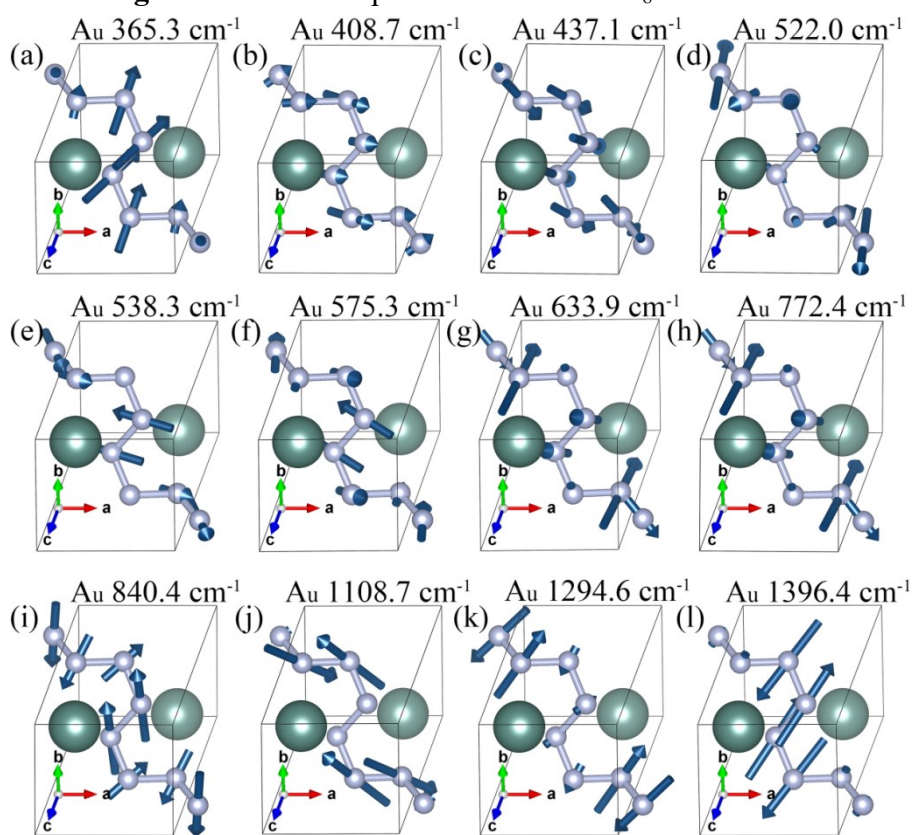

**Figure.S11.** IR active images of  $P\text{-1-II-YN}_4$ .

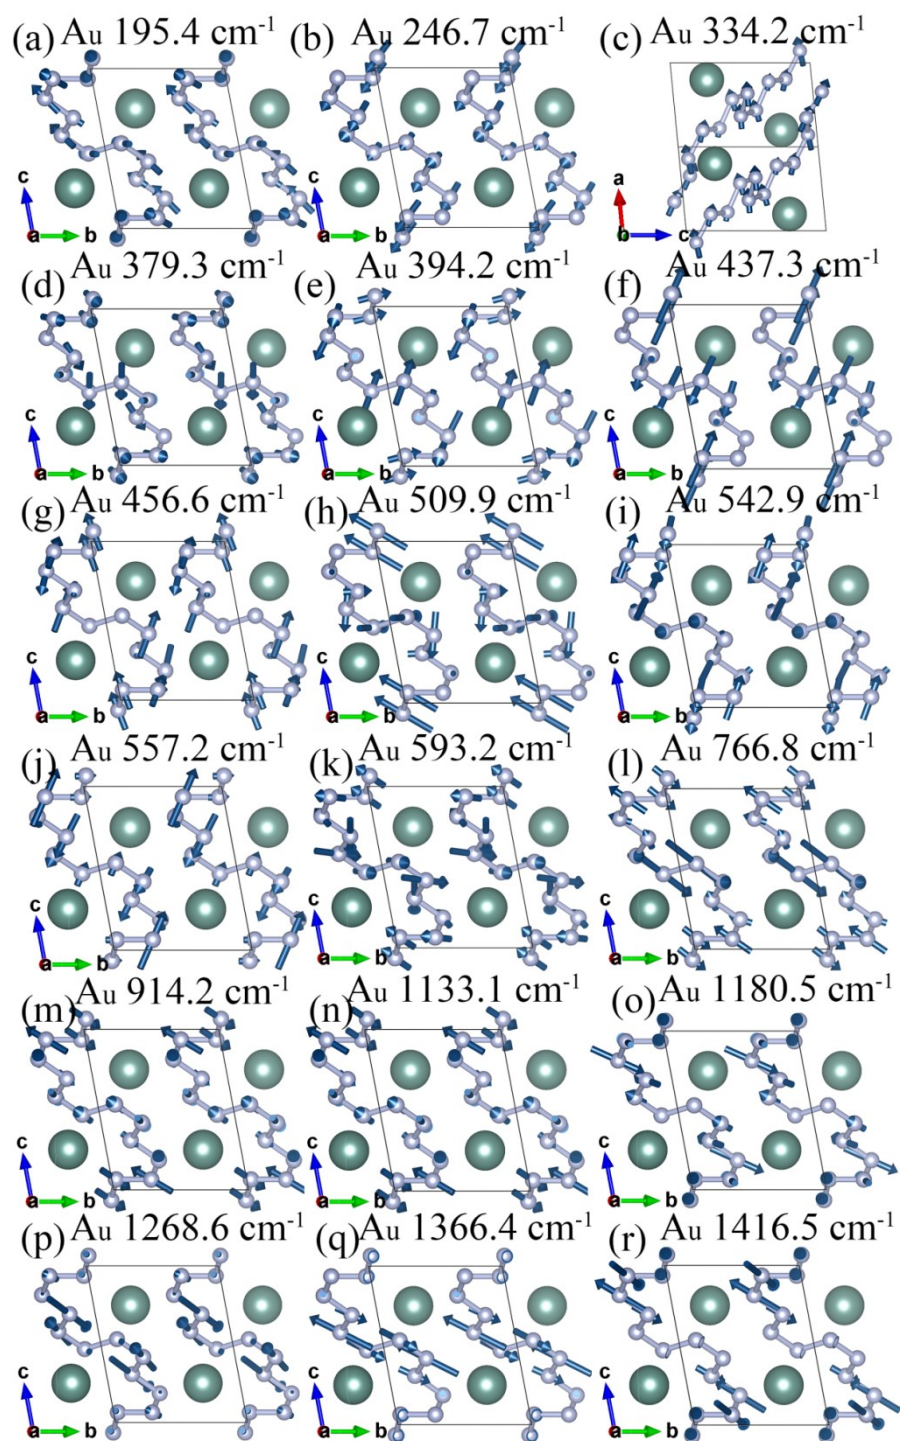

Figure.S12. IR active images of *P*-1-YN<sub>6</sub>.

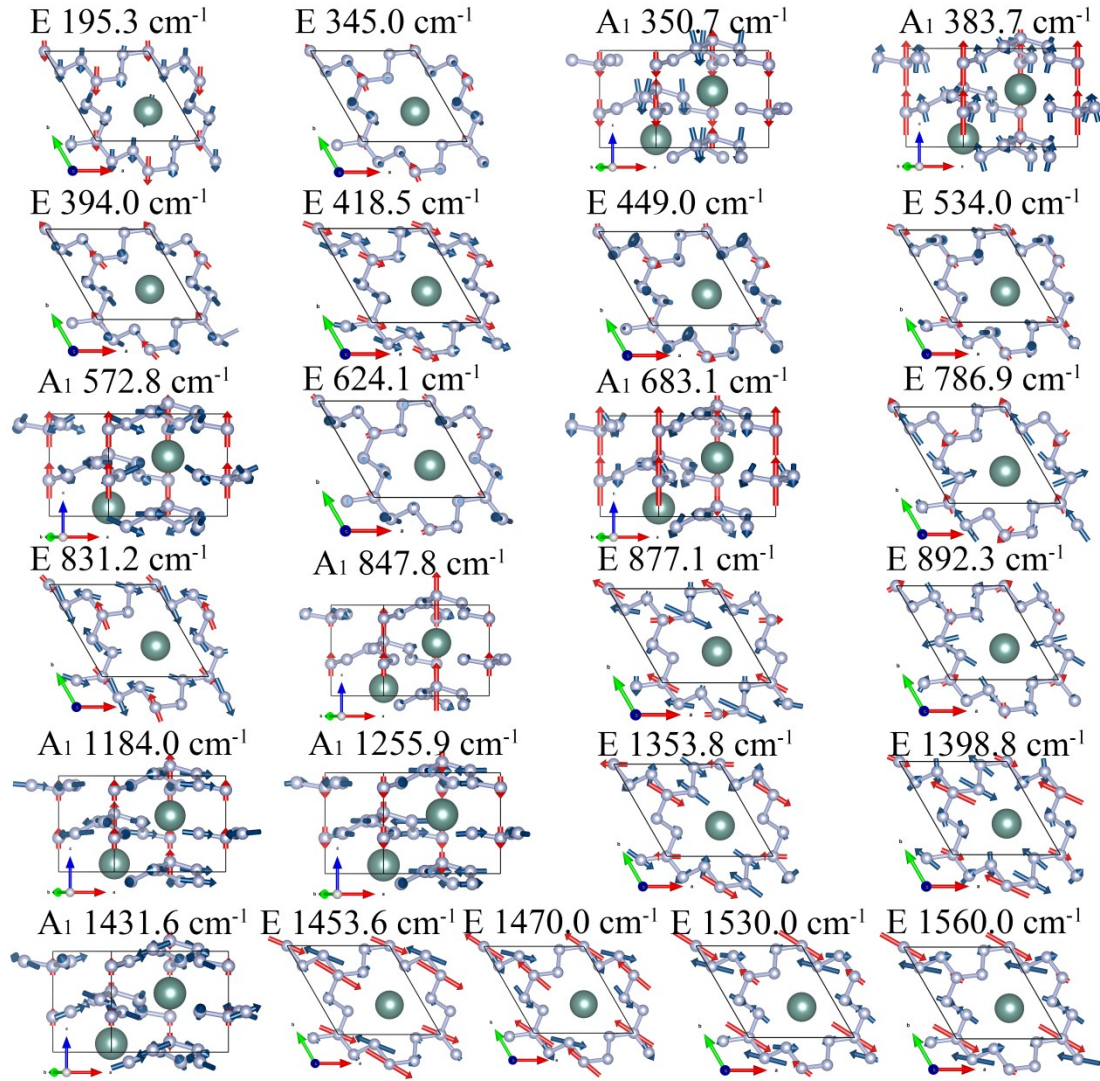

**Figure.S13.** IR active images of  $P31c$ - $YN_8$ .

**Table S1.** Elastic tensor  $C_{ij}$  (in GPa) of cubic  $I-43d$ - $Y_4N_3$ :

| $C_{ij}$ | 1       | 2       | 3       | 4       | 5       | 6       |
|----------|---------|---------|---------|---------|---------|---------|
| 1        | 745.323 | 207.651 | 207.663 | 0.029   | 0.032   | 0.037   |
| 2        | 207.651 | 745.318 | 207.654 | 0.030   | 0.043   | 0.030   |
| 3        | 207.663 | 207.654 | 745.328 | 0.026   | 0.032   | 0.039   |
| 4        | 0.029   | 0.030   | 0.026   | 147.480 | 0.009   | 0.009   |
| 5        | 0.032   | 0.043   | 0.032   | 0.009   | 147.476 | 0.002   |
| 6        | 0.037   | 0.030   | 0.039   | 0.009   | 0.002   | 147.467 |

**Table S2.** Elastic tensor  $C_{ij}$  (in GPa) of rhombohedral  $R3c$ - $Y_2N_3$ :

| $C_{ij}$ | 1       | 2       | 3       | 4       | 5     | 6     |
|----------|---------|---------|---------|---------|-------|-------|
| 1        | 705.652 | 271.457 | 323.263 | -72.511 | 0.000 | 0.000 |
| 2        | 271.457 | 705.652 | 323.263 | 72.511  | 0.000 | 0.000 |
| 3        | 323.263 | 323.263 | 793.240 | 0.000   | 0.000 | 0.000 |



|   |         |        |       |         |         |         |
|---|---------|--------|-------|---------|---------|---------|
| 4 | -72.511 | 72.511 | 0.000 | 270.018 | 0.000   | 0.000   |
| 5 | 0.000   | 0.000  | 0.000 | 0.000   | 270.018 | -72.511 |
| 6 | 0.000   | 0.000  | 0.000 | 0.000   | -72.511 | 217.097 |

**Table S3.** Elastic tensor  $C_{ij}$  (in GPa) of triclinic  $P-1-II-YN_4$ :

| $C_{ij}$ | 1       | 2       | 3       | 4       | 5       | 6       |
|----------|---------|---------|---------|---------|---------|---------|
| 1        | 626.629 | 242.375 | 266.719 | -7.653  | 8.49    | -8.186  |
| 2        | 242.375 | 996.54  | 245.267 | -31.671 | -31.073 | 77.867  |
| 3        | 266.719 | 245.267 | 695.532 | -7.591  | -83.248 | -15.114 |
| 4        | -7.653  | -31.671 | -7.591  | 196.406 | 10.225  | -61.593 |
| 5        | 8.49    | -31.073 | -83.248 | 10.225  | 211.865 | 10.118  |
| 6        | -8.186  | 77.867  | -15.114 | -61.593 | 10.118  | 217.043 |

**Table S4.** Elastic tensor  $C_{ij}$  (in GPa) of triclinic  $P-1-YN_6$ :

| $C_{ij}$ | 1       | 2        | 3       | 4        | 5       | 6       |
|----------|---------|----------|---------|----------|---------|---------|
| 1        | 599.118 | 252.695  | 177.616 | -71.517  | 10.015  | -24.61  |
| 2        | 252.695 | 386.018  | 219.506 | -120.224 | -13.156 | 51.382  |
| 3        | 177.616 | 219.506  | 347.887 | 47.762   | 28.918  | -8.231  |
| 4        | -71.517 | -120.224 | 47.762  | 185.717  | -10.785 | -20.54  |
| 5        | 10.015  | -13.156  | 28.918  | -10.785  | 89.277  | -81.411 |
| 6        | -24.61  | 51.382   | -8.231  | -20.54   | -81.411 | 173.399 |

**Table S5.** Elastic tensor  $C_{ij}$  (in GPa) of trigonal  $P31c-YN_8$ :

| $C_{ij}$ | 1        | 2        | 3       | 4       | 5       | 6       |
|----------|----------|----------|---------|---------|---------|---------|
| 1        | 1158.402 | 253.814  | 304.103 | 0.000   | -60.767 | 0.000   |
| 2        | 253.814  | 1158.402 | 304.103 | 0.000   | 60.767  | 0.000   |
| 3        | 304.103  | 304.103  | 845.926 | 0.000   | 0.000   | 0.000   |
| 4        | 0.000    | 0.000    | 0.000   | 140.746 | 0.000   | 60.767  |
| 5        | -60.767  | 60.767   | 0.000   | 0.000   | 140.746 | 0.000   |
| 6        | 0.000    | 0.000    | 0.000   | 60.767  | 0.000   | 452.294 |

The mechanical stability criteria of cubic structure shown as follows:

$$C_{11}-C_{12}>0;$$

$$C_{11}+2C_{12}>0;$$

$$C_{44}>0.$$

The cubic  $I-43d-Y_4N_3$  is mechanically stable due to their elastic tensor  $C_{ij}$  satisfy to all the criteria.

The mechanical stability criteria of tetragonal structure shown as follows:

$$C_{11}>|C_{12}|;$$

$$2C_{13}C_{13}<C_{33}(C_{11}+C_{12});$$

$$C_{44}>0.$$

The rhombohedral  $R3c$ - $Y_2N_3$  is mechanically stable due to their elastic tensor  $C_{ij}$  satisfy to all the criteria.

The mechanical stability criteria of monoclinic/triclinic structure shown as follows:

$$\begin{aligned}
&C_{11}>0 \\
&C_{22}>0 \\
&C_{33}>0 \\
&C_{44}>0 \\
&C_{55}>0 \\
&C_{66}>0 \\
&[C_{11}+C_{22}+C_{33}+2(C_{12}+C_{13}+C_{23})]>0 \\
&(C_{33}C_{55}-C_{35}C_{35})>0 \\
&(C_{44}C_{66}-C_{46}C_{46})>0 \\
&(C_{22}+C_{33}-2C_{23})>0 \\
&(C_{22}(C_{33}C_{55}-C_{35}C_{35})+2C_{23}C_{25}C_{35}-C_{23}C_{23}C_{55}-C_{25}C_{25}C_{33})>0(2(C_{15}C_{25}(C_{33}C_{12}- \\
&C_{13}C_{23})+C_{15}C_{35}(C_{22}C_{13}-C_{12}C_{23})+C_{25}C_{35}(C_{11}C_{23}-C_{12}C_{13}))-C_{15}C_{15}(C_{23}C_{33}- \\
&C_{23}C_{23})+C_{25}C_{25}(C_{11}C_{33}-C_{13}C_{13})+C_{35}C_{35}(C_{11}C_{22}-C_{12}C_{12}))+C_{55}g)>0 \\
&g=C_{11}C_{22}C_{33} - C_{11}C_{23}C_{23} - C_{22}C_{13}C_{13} - C_{33}C_{12}C_{12} + 2C_{12}C_{13}C_{23}
\end{aligned}$$

The triclinic  $P$ -1-II- $YN_4$  and triclinic  $P$ -1- $YN_6$  are mechanically stable due to their elastic tensor  $C_{ij}$  satisfy to all the criteria.

The mechanical stability criteria of trigonal structure shown as follows:

$$\begin{aligned}
&C_{11}>|C_{12}|; \\
&C_{13}C_{13}<0.5C_{33}(C_{11}+C_{12}); \\
&C_{14}C_{14}<0.5C_{44}(C_{11}-C_{12}); \\
&C_{44}>0.
\end{aligned}$$

The trigonal  $P31c$ - $YN_8$  is mechanically stable due to their elastic tensor  $C_{ij}$  satisfy to all the criteria.

**Table S6.** Crystal structure parameters for Y-N compounds.

| Comp<br>ounds | Pressure<br>(GPa) | Space<br>Group | Lattice Parameters                                               | Wyckoff Positions |        |        |        |
|---------------|-------------------|----------------|------------------------------------------------------------------|-------------------|--------|--------|--------|
| $Y_4N_3$      | 100               | $I-43d$        | a=b=c=6.6724<br>$\alpha=\beta=\gamma=90^\circ$                   | Y1                | 0.4334 | 0.9334 | 0.5666 |
|               |                   |                |                                                                  | N1                | 0.75   | 0.125  | 0.0000 |
| $Y_2N_3$      | 100               | $R3c$          | a=b=10.1362,c=6.2071<br>$\alpha=\beta=90^\circ,\gamma=120^\circ$ | Y1                | 0.2308 | 0.3653 | 0.4145 |
|               |                   |                |                                                                  | Y2                | 0.0000 | 0.0000 | 0.4526 |
|               |                   |                |                                                                  | N1                | 0.0736 | 0.1766 | 0.6958 |
|               |                   |                |                                                                  | N2                | 0.2302 | -0.098 | 0.5688 |
| $YN_4$        | 100               | $P$ -1-II      | a=3.9200,b=4.0558,c=4.9745                                       | Y1                | 0.7804 | 0.2528 | 0.2176 |

|                 |     |             |                                                                                                      |    |        |        |        |
|-----------------|-----|-------------|------------------------------------------------------------------------------------------------------|----|--------|--------|--------|
|                 |     |             | $\alpha=93.2471^\circ, \beta=111.7120^\circ, \gamma=96.9587^\circ$                                   | N1 | 0.9301 | 0.2129 | 0.7158 |
|                 |     |             |                                                                                                      | N2 | 0.3940 | 0.3649 | 0.5125 |
|                 |     |             |                                                                                                      | N3 | 0.4154 | 0.8019 | 0.2859 |
|                 |     |             |                                                                                                      | N4 | 0.8253 | 0.7466 | 0.0186 |
| YN <sub>6</sub> | 50  | <i>P-1</i>  | $a=3.7918, b=5.2520, c=5.9531$<br>$\alpha=99.2457^\circ, \beta=91.7902^\circ, \gamma=110.7240^\circ$ | Y1 | 0.8000 | 0.7188 | 0.2504 |
|                 |     |             |                                                                                                      | N1 | 0.8061 | 0.6235 | 0.8140 |
|                 |     |             |                                                                                                      | N2 | 0.5646 | 0.3011 | 0.4180 |
|                 |     |             |                                                                                                      | N3 | 0.3440 | 0.9681 | 0.9352 |
|                 |     |             |                                                                                                      | N4 | 0.3655 | 0.8708 | 0.4682 |
|                 |     |             |                                                                                                      | N5 | 0.7777 | 0.8059 | 0.6917 |
|                 |     |             |                                                                                                      | N6 | 0.8572 | 0.2927 | 0.0644 |
| YN <sub>8</sub> | 150 | <i>P31c</i> | $a=52216, b=5.2216, c=4.4949$<br>$\alpha=\beta=90^\circ, \gamma=106.1348^\circ$                      | Y1 | 0.6667 | 0.3333 | 0.5845 |
|                 |     |             |                                                                                                      | N1 | 0.2630 | 0.2242 | 0.9009 |
|                 |     |             |                                                                                                      | N2 | 0.7005 | 0.5905 | 0.0216 |
|                 |     |             |                                                                                                      | N3 | 0.6667 | 0.3333 | 0.1030 |
|                 |     |             |                                                                                                      | N4 | 0.0000 | 0.0000 | 0.8526 |
